# Supplementary material for: Synoptic reporting increases quality of upper gastrointestinal cancer pathology reports
Source: PubMed Central journal article supplement (PMC6647878; doi:10.1007/s00428-019-02586-w), 2019-05-29

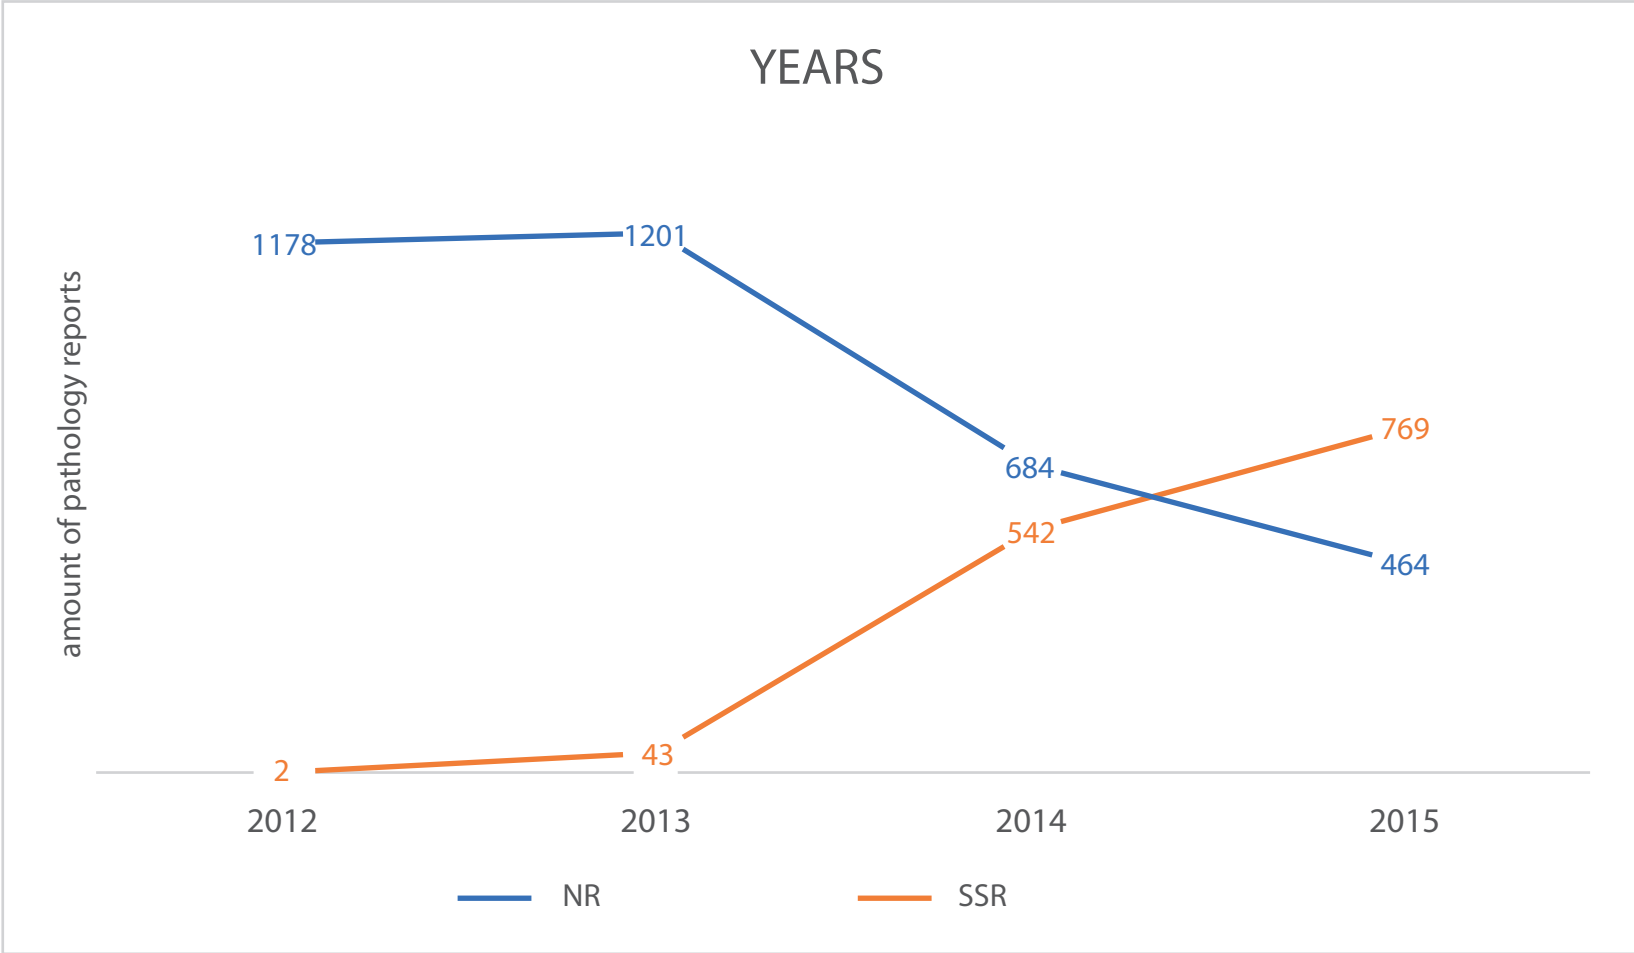

Supplement: 428_2019_2586_MOESM1_ESM.pdf [file 428_2019_2586_MOESM1_ESM.pdf]
